# Supplementary material for: Ultrafast conversion of carcinogenic 4-nitrophenol into 4-aminophenol in the dark catalyzed by surface interaction on BiPO4/g-C3N4 nanostructures in the presence of NaBH4
Source: Royal Society of Chemistry journal article supplement (doi:10.1039/d1ra02852a), 2021-01-01
Supplement: d1ra02852a1.pdf [file d1ra02852a1.pdf]

## Supplementary Information

### Ultrafast conversion of carcinogenic 4-nitrophenol into 4-aminophenol in dark catalyzed by surface interaction on BiPO<sub>4</sub>/g-C<sub>3</sub>N<sub>4</sub> nanostructures in the presence of NaBH<sub>4</sub>

Ahmed B. Azzam <sup>a\*</sup>, Ridha Djellabi <sup>b</sup>, Sheta M. Sheta <sup>c</sup>, S.M. El-Sheikh <sup>d</sup>

<sup>a\*</sup> Faculty of Science, Chemistry Department, Helwan University, Ain Helwan, Cairo 11795, Egypt

<sup>b</sup> Università degli Studi di Milano, Dip. Chimica and INSTM-UdR Milano, Via Golgi, 19, 20133 Milano - Italy

<sup>c</sup> Department of Inorganic Chemistry, National Research Centre, 33, El-Behouth St., Dokki, Giza 12622, Egypt

<sup>d</sup> Nanomaterials and Nanotechnology Department, Advanced Materials Division, Central Metallurgical R & D Institute (CMRDI), P.O. Box, 87 Helwan, 11421 Cairo, Egypt

\*Corresponding authors: Ahmed B. Azzam, [ahmed\\_azzam2000@hotmail.com](mailto:ahmed_azzam2000@hotmail.com), Tel.

+201285259709

### *Experimental*

#### *Materials*

Bismuth nitrate pentahydrate [Bi(NO<sub>3</sub>)<sub>3</sub>·5H<sub>2</sub>O, 99.99%], diammonium hydrogen phosphate [(NH<sub>4</sub>)<sub>2</sub>HPO<sub>4</sub>>99.0%], Dimethyl sulfoxide (DMSO>99.9%) urea [(NH<sub>2</sub>)<sub>2</sub>CO>99.0%], [melamine>99.0%], and cetyltrimethylammonium bromide (CTAB, 98%) were obtained from Sigma-Aldrich. All the chemicals were used without any purification as they were received.

#### *Characterization*

The crystallinity of the as-prepared samples was measured on X-ray diffraction (XRD) on Bruker (Axs D8- advance diffractometer using Cu-K $\alpha$  radiation ( $\lambda$ = 1.5406 Å) with 2 $\theta$  ranging from 10° to 70° and scan rate of 2° min<sup>-1</sup>, Germany). Quanta FEG-250 scanning electron microscopy (SEM) with 30 kV accelerated

voltage was used to acquire the surface morphology of catalysts. Transmission electron microscopy (TEM) images are recorded on (TEM, JEOLJEM-1230, Japan). X-ray photoelectron spectroscopic (XPS) measurements were performed using a Thermo Scientific K $\alpha$  system employing monochromatic Al K $\alpha$  radiation. The vibration spectrum of samples were taken with a Fourier Infrared absorption spectrometer (FT-IR) using PerkinElmer Spectrum (200–4,000 cm<sup>-1</sup>).

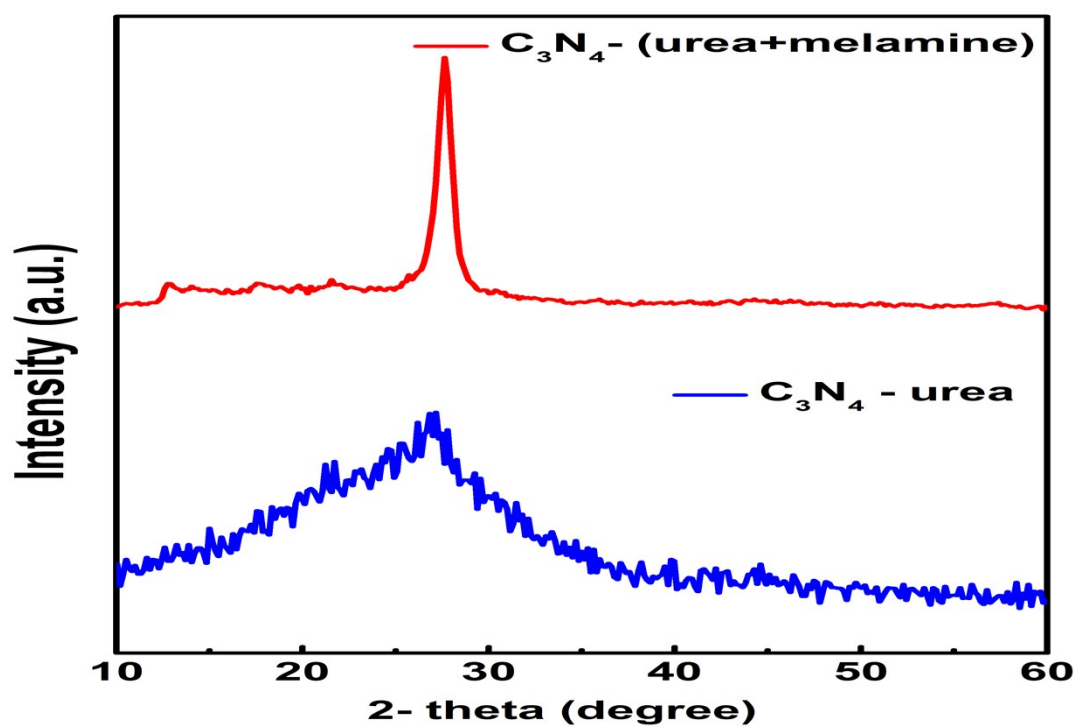

**Fig. S1** X-ray diffraction patterns of  $C_3N_4$ -urea, and  $C_3N_4$ - (urea + melamine)
